# Supplementary material
Source: MDPI journal article supplement (https://www.mdpi.com/2071-1050/16/7/2889)
Supplement: s1 [file s1]

## Supplementary Material

### The Influence of Biowaste Type on the Physicochemical and Sorptive Characteristics of Corresponding Biochar Used as Sustainable Sorbent

Nikolaos Mourgkogiannis, Ioannis Nikolopoulos, Eleana Kordouli \*, Alexis Lycourghiotis, Christos Kordulis and Hrisi K. Karapanagioti \*

Department of Chemistry, University of Patras, GR-26504 Patras, Greece;  
nikosmorgan@hotmail.com (N.M.); gs.nikol@gmail.com (I.N.);  
alycour@upatras.gr (A.L.); kordulis@upatras.gr (C.K.)

\* Correspondence: ekordouli@upatras.gr (E.K.); karapanagioti@upatras.gr (H.K.K.)

**Table S1.** EDS elemental analysis of the materials studied.

| Samples | C    | O    | N    | Si   | K    | Ca   | Mg   |
|---------|------|------|------|------|------|------|------|
| SCG     | 61   | 30   | 7.35 | -    | 1    | 0.5  | 0.15 |
| SCG-B   | 67   | 22   | 8.2  | -    | 1.6  | 1    | 0.2  |
| SGC     | 60.5 | 32   | 7    | -    | 0.3  | 0.05 | 0.15 |
| SGC-B   | 68   | 23.7 | 7.5  | -    | 0.5  | 0.1  | 0.18 |
| GSW     | 66   | 33   | -    | -    | 0.35 | 0.6  | 0.05 |
| GSW-B   | 70   | 28.7 | -    | 0.05 | 0.45 | 0.65 | 0.15 |
| GST     | 65   | 34   | -    | -    | 0.65 | 0.35 | 0.1  |
| GST-B   | 71   | 27   | -    | 0.2  | 1    | 0.7  | 0.1  |
| RH      | 40   | 31   | -    | 28   | 1    | -    | -    |
| RH-B    | 45   | 21   | -    | 32   | 1.2  | 0.1  | 0.7  |

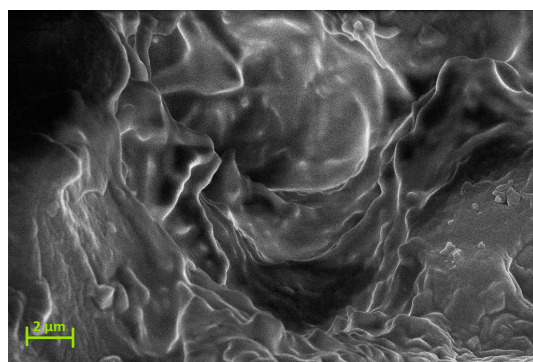

(a)

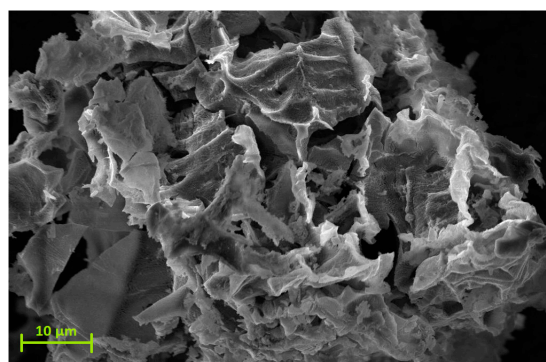

(b)

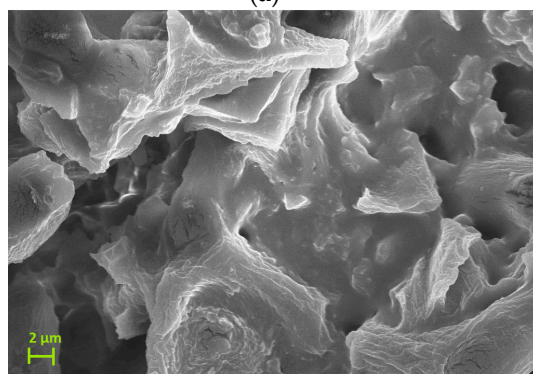

(c)

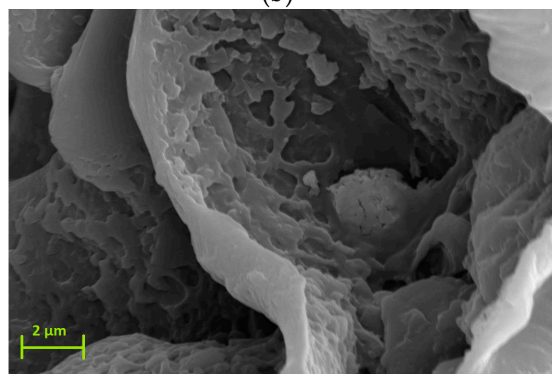

(d)

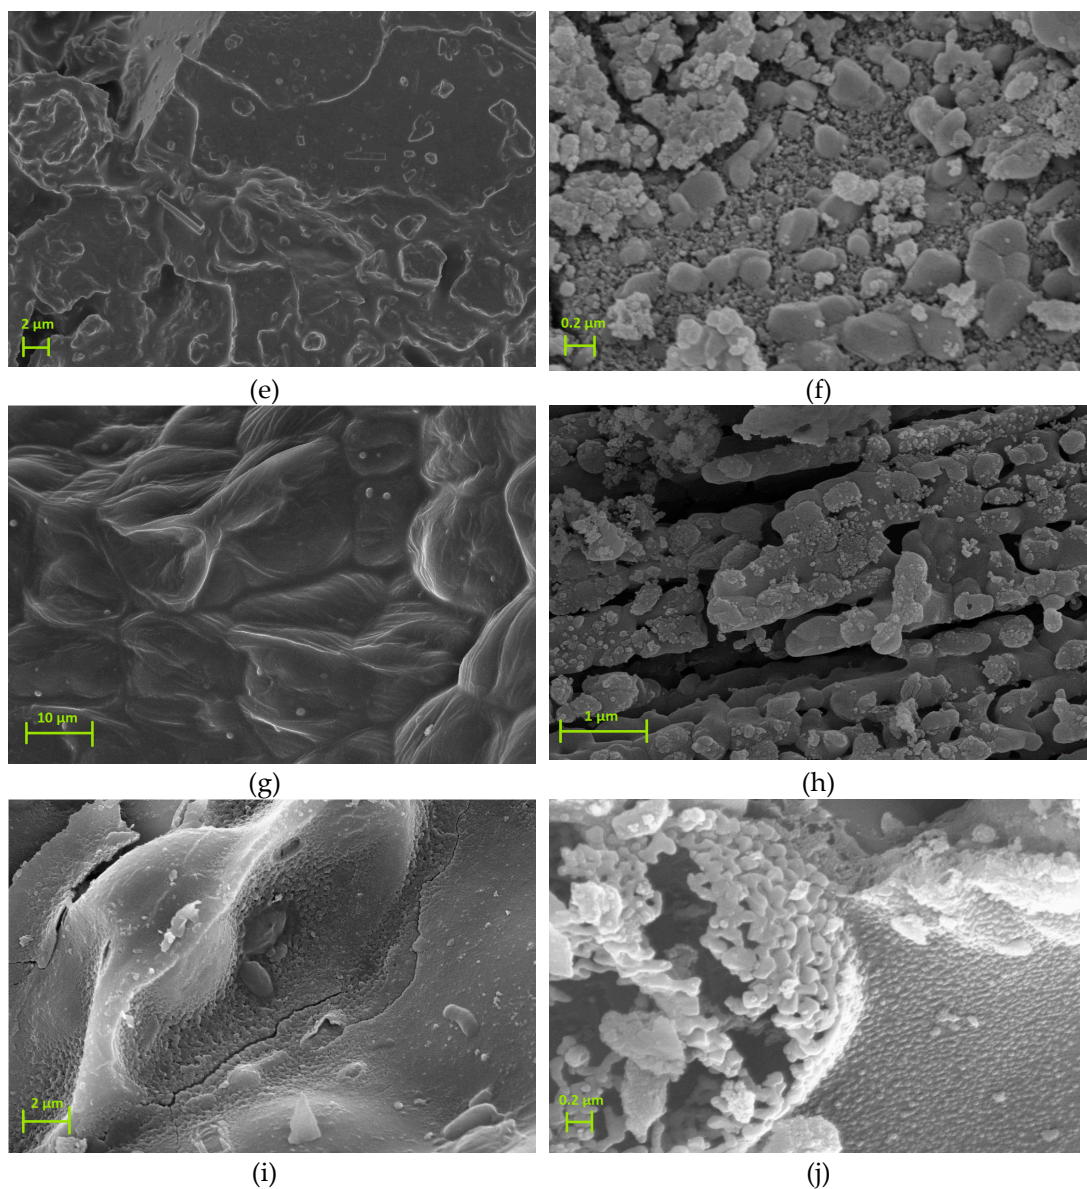

**Figure S1.** SEM micrographs of raw materials and biochar samples obtained. (a) SCG, (b) SCG-B, (c) SGC, (d) SGC-B (e) GSW, (f) GSW-B, (g) GST, (h) GST-B, (i) RH, and (j) RH-B.

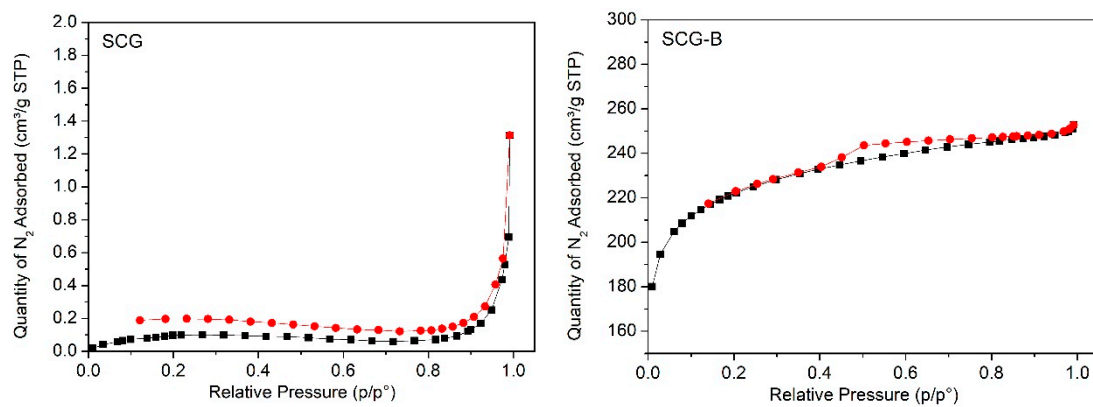

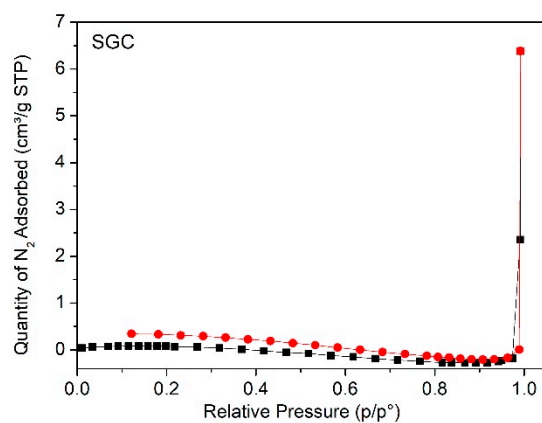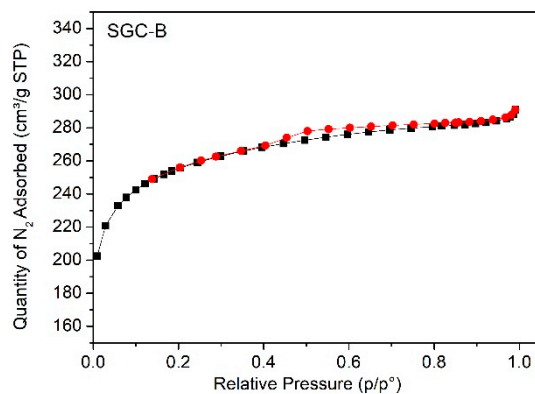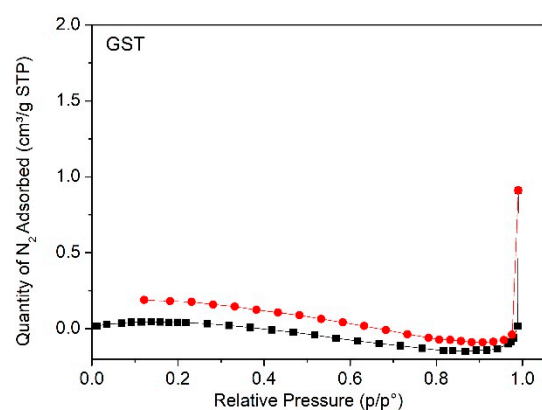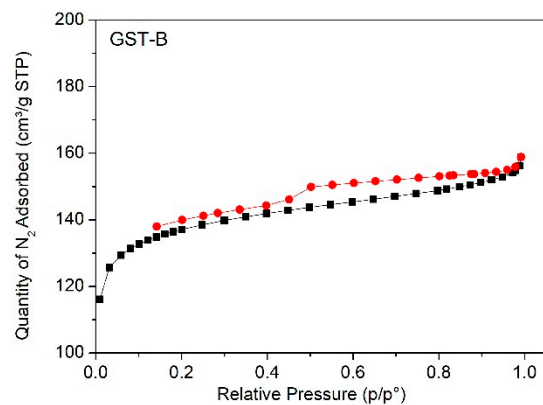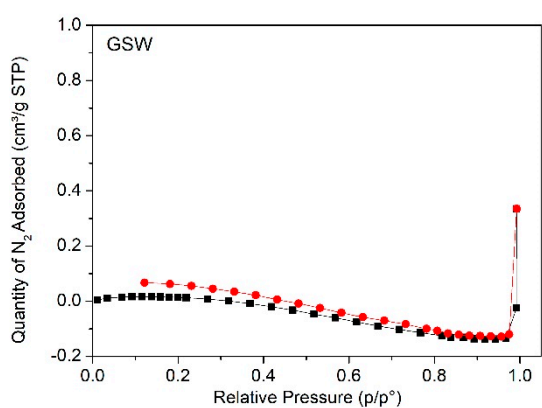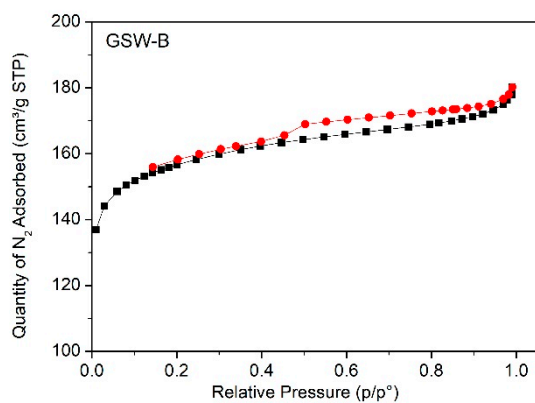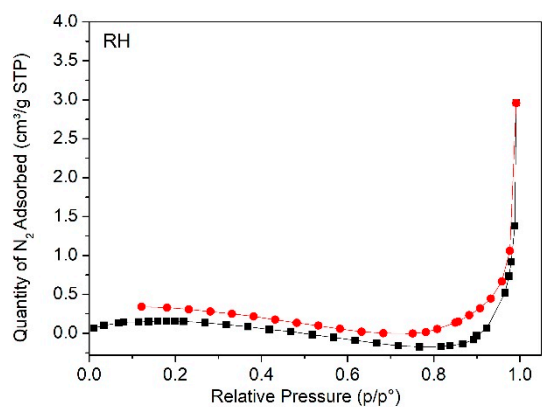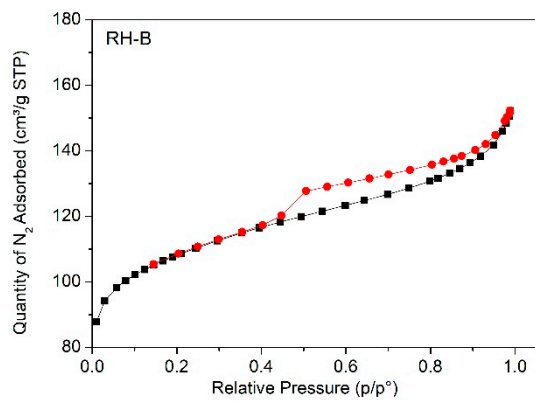

**Figure S2.** N<sub>2</sub> adsorption-desorption isotherms recorded at liquid nitrogen temperature of raw materials and biochar samples obtained.

Figure S2 (left) shows the adsorption-desorption isotherms of biowaste materials. These isotherms belongs to Type III isotherm according to IUPAC classification, indicating a nonporous or macroporous solid. Figure S2 (right) shows the adsorption-desorption isotherms of biochar samples. These isotherms is a mixing of Type I and Type IV isotherms of IUPAC classification with Type H4 hysteresis loop. These isotherms are characteristic for microporous solids, like active carbon and zeolites having also a significant fraction of mesoporous (pore diameter in the range 2 -50 nm) [58].

[58] M. Thommes\*, K. Kaneko, A. V. Neimark, J. P. Olivier, F. Rodriguez-Reinoso, J. Rouquerol, K. S.W. Sing. Physisorption of gases, with special reference to the evaluation of surface area and pore size distribution (IUPAC Technical Report), Pure Appl. Chem. 2015; DOI 10.1515/pac-2014-1117
